# Supplementary material for: Environmental coastal management for groundwater resources using different aquifer bed slopes considering sea level rise risk
Source: Research Square preprint supplement (doi:10.21203/rs.3.rs-1307616/v1), 2022-02-17
Supplement: Supplementary file 1 [file 1c43880e1c54bc0479173b2a.docx]

**Table 3**: Salt repulsion percentage for the Henry problem

| Run number |  |  | Values | Salt repulsion (%) | | |
| --- | --- | --- | --- | --- | --- | --- |
| Protection method |  | Sea side slope | Horizontal slope | Landside slope |
| 1 | 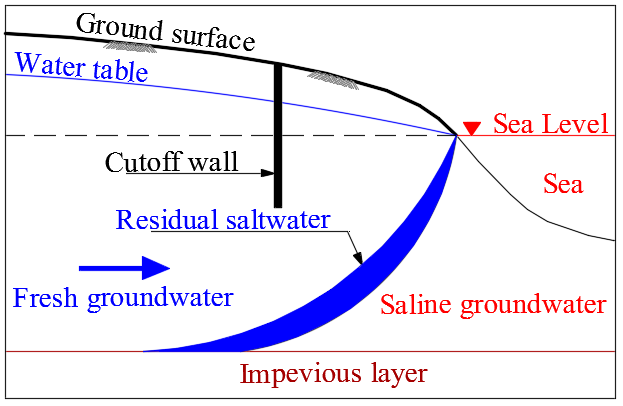 | Cutoff wall depths  (cm) | 15 | +6.23 | +9.97 | +-6.07 |
| 2 | 30 | +19.38 | +24.74 | +19.58 |
| 2 | 45 | +34.26 | +35.31 | +36.27 |
| 4 | 60 | +47.64 | +50.34 | +52.71 |
|  | Average | +26.88 | +30.09 | +28.66 |
|  |  |  |  |  |
| 5 | 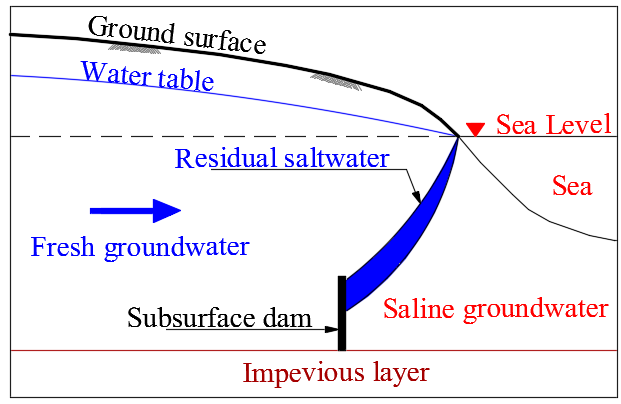 | Subsurface dam depths  (cm) | 15 | +3.56 | +3.44 | +3.21 |
| 6 | 30 | +10.14 | +10.58 | +10.58 |
| 7 | 45 | +13.43 | +17.12 | +18.52 |
| 8 | 60 | +14.38 | +18.66 | +21.90 |
|  | Average | +10.38 | +12.45 | +13.55 |
|  |  |  |  |  |
| 9 | 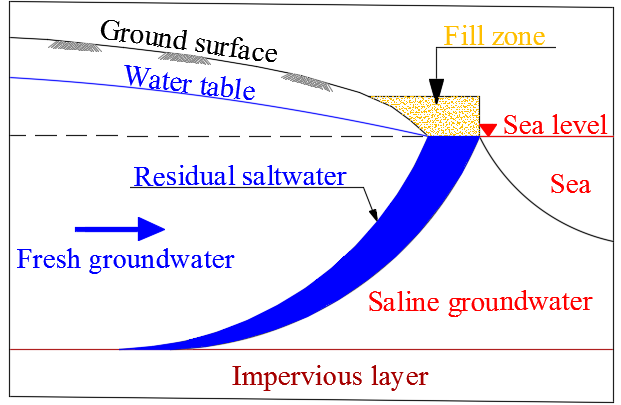 | Earth fill Permeability  (m day-1) | 734.40 | +3.39 | +6.83 | +8.78 |
| 10 | 604.80 | +9.85 | +12.62 | +14.09 |
| 11 | 345.60 | +16.67 | +21.18 | +22.13 |
| 12 | 216 | +33.78 | +34.96 | +35.43 |
|  | Average | +15.92 | +18.90 | +20.11 |
|  |  |  |  |  |
| 13 | 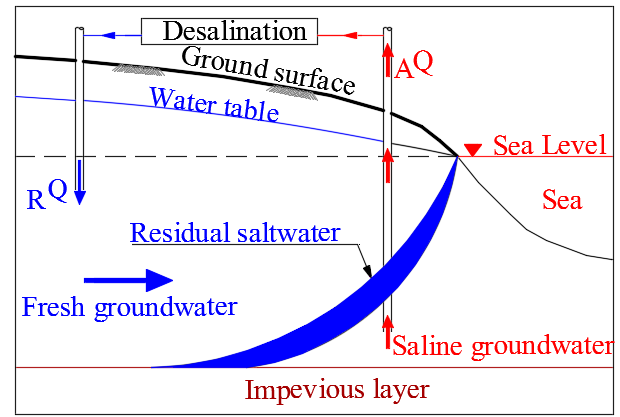 | Freshwater  recharge rates  (m3 day-1) | 0.11404 | +14.38 | +14.17 | +14.05 |
| 14 | 0.22808 | +26.17 | +26.11 | +26.17 |
| 15 | 0.34212 | +35.92 | +36.17 | +36.59 |
| 16 | 0.45616 | +44.04 | +44.63 | +45.48 |
|  |  | Average | +30.13 | +30.27 | +30.57 |
| 17 | Brackish water abstraction rates  (m3 day-1) | 0.11404 | +3.05 | -2.69 | +2.44 |
| 18 | 0.22808 | +6.21 | -5.57 | +5.11 |
| 19 | 0.34212 | +9.26 | -8.45 | +7.85 |
| 20 | 0.45616 | +12.02 | -11.19 | +10.53 |
|  |  | Average | +7.64 | -6.97 | +6.48 |
| 21 | Combine of two cases rates  (m3 day-1) | 0.11404 | +17.51 | +17.00 | +16.65 |
| 22 | 0.22808 | +31.14 | +30.66 | +30.42 |
| 23 | 0.34212 | +41.24 | +41.12 | +41.25 |
| 24 | 0.45616 | +48.33 | +48.75 | +49.32 |
|  |  |  | Average | +34.55 | +34.38 | +34.41 |
| 25 | 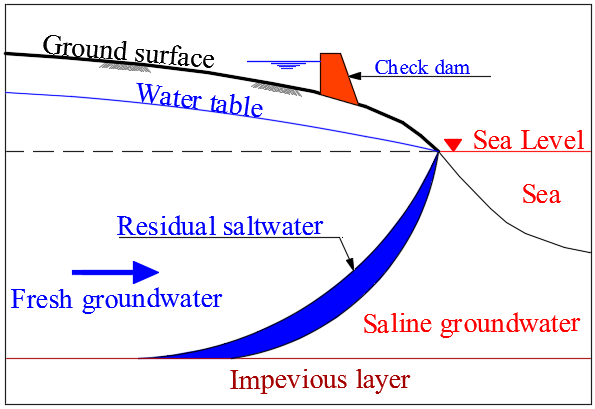 | Check dam heads  (cm) | 17.50 | +21.39 | +22.73 | +20.13 |
| 26 | 18 | +39.67 | +42.35 | +37.92 |
| 27 | 18.50 | +52.66 | +55.99 | +54.79 |
| 28 | 19 | +62.27 | +65.77 | +62.45 |
|  |  | Average | +44.00 | +46.71 | +43.82 |
|  |  |  |  |  |  |
