# Supplementary material for: Environmental coastal management for groundwater resources using different aquifer bed slopes considering sea level rise risk
Source: Research Square preprint supplement (doi:10.21203/rs.3.rs-1307616/v1), 2022-02-17
Supplement: Supplementary file 2 [file 806a03d52c6d8c2ebf99bcc0.docx]

**Highlights**

- Coastal aquifers with land side bed slopes are more affected by SWI than sea side and horizontal bed slopes,
- Climate change risk (SLR, precipitation) and artificial forces (over pumping) worst SWI,
- Cutoff walls and check dams work better for horizontal bed aquifers,
- Subsurface dams, earth fill and freshwater recharge work better for land bed slope aquifer,
- Abstraction of brackish water and combination of recharge and abstraction work better for sea side slope aquifers.
