# Supplementary material for: Environmental coastal management for groundwater resources using different aquifer bed slopes considering sea level rise risk
Source: Research Square preprint supplement (doi:10.21203/rs.3.rs-1307616/v1), 2022-02-17
Supplement: Supplementary file 3 [file ed75e9ddaa425bc8de813ee3.docx]

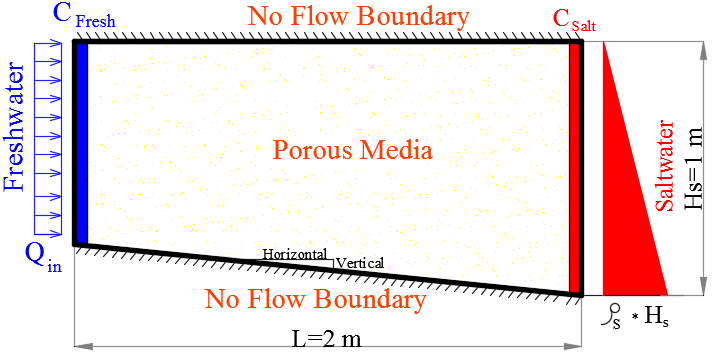

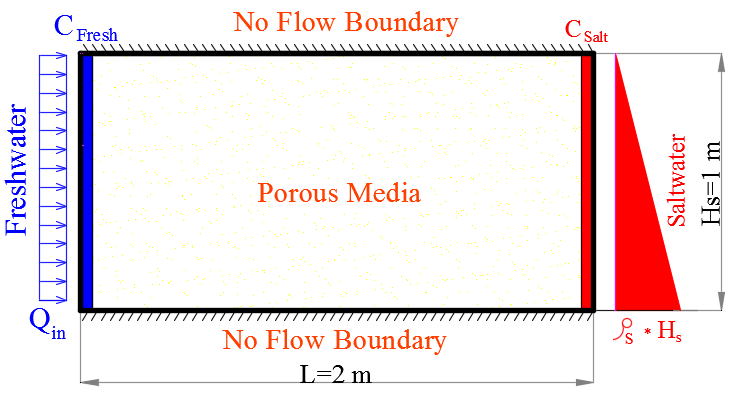

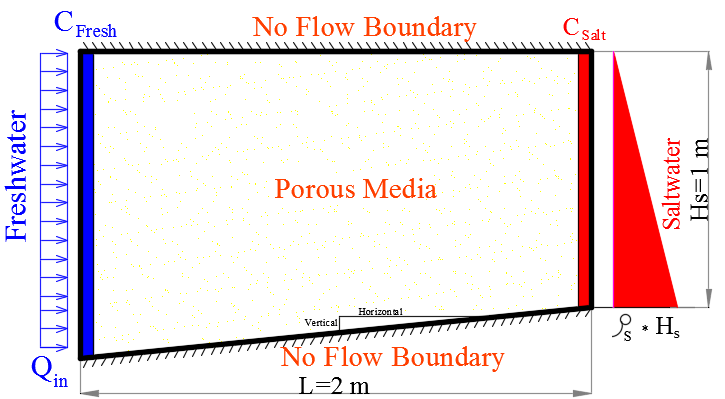


**Sea side bed slope Horizontal bed slope Landside bed sloe**


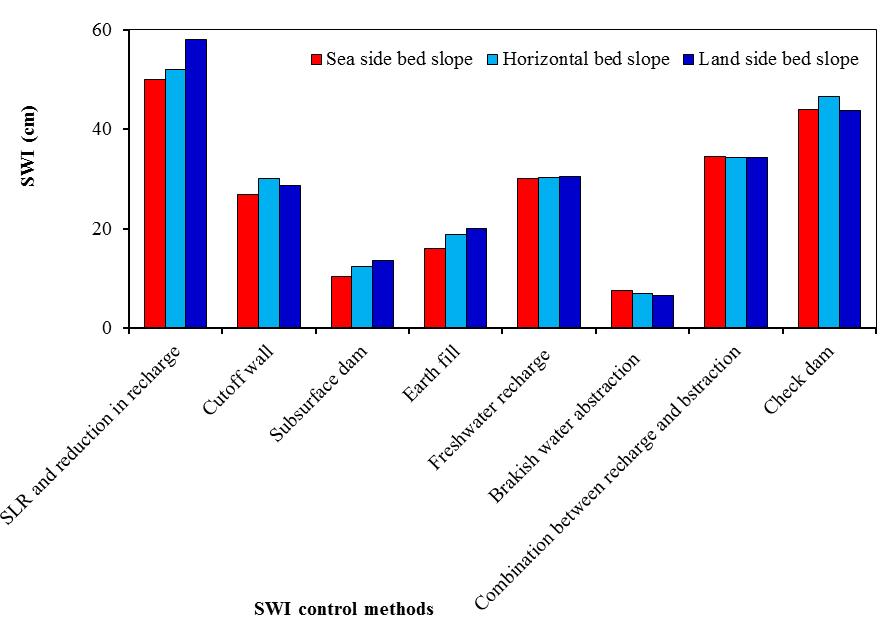


**SWI repulsion** **of different aquifer bed slope for current case, future and management scenarios**
